# Supplementary material
Source: Oxford University Press journal article supplement (https://arvo.silverchair-cdn.com/arvo/content_public/journal/iovs/932950/supplementary_figures1_for_on_iovs.pdf)
Supplement: Supplementary file 1 [file supplementary_figures1_for_on_iovs.pdf]

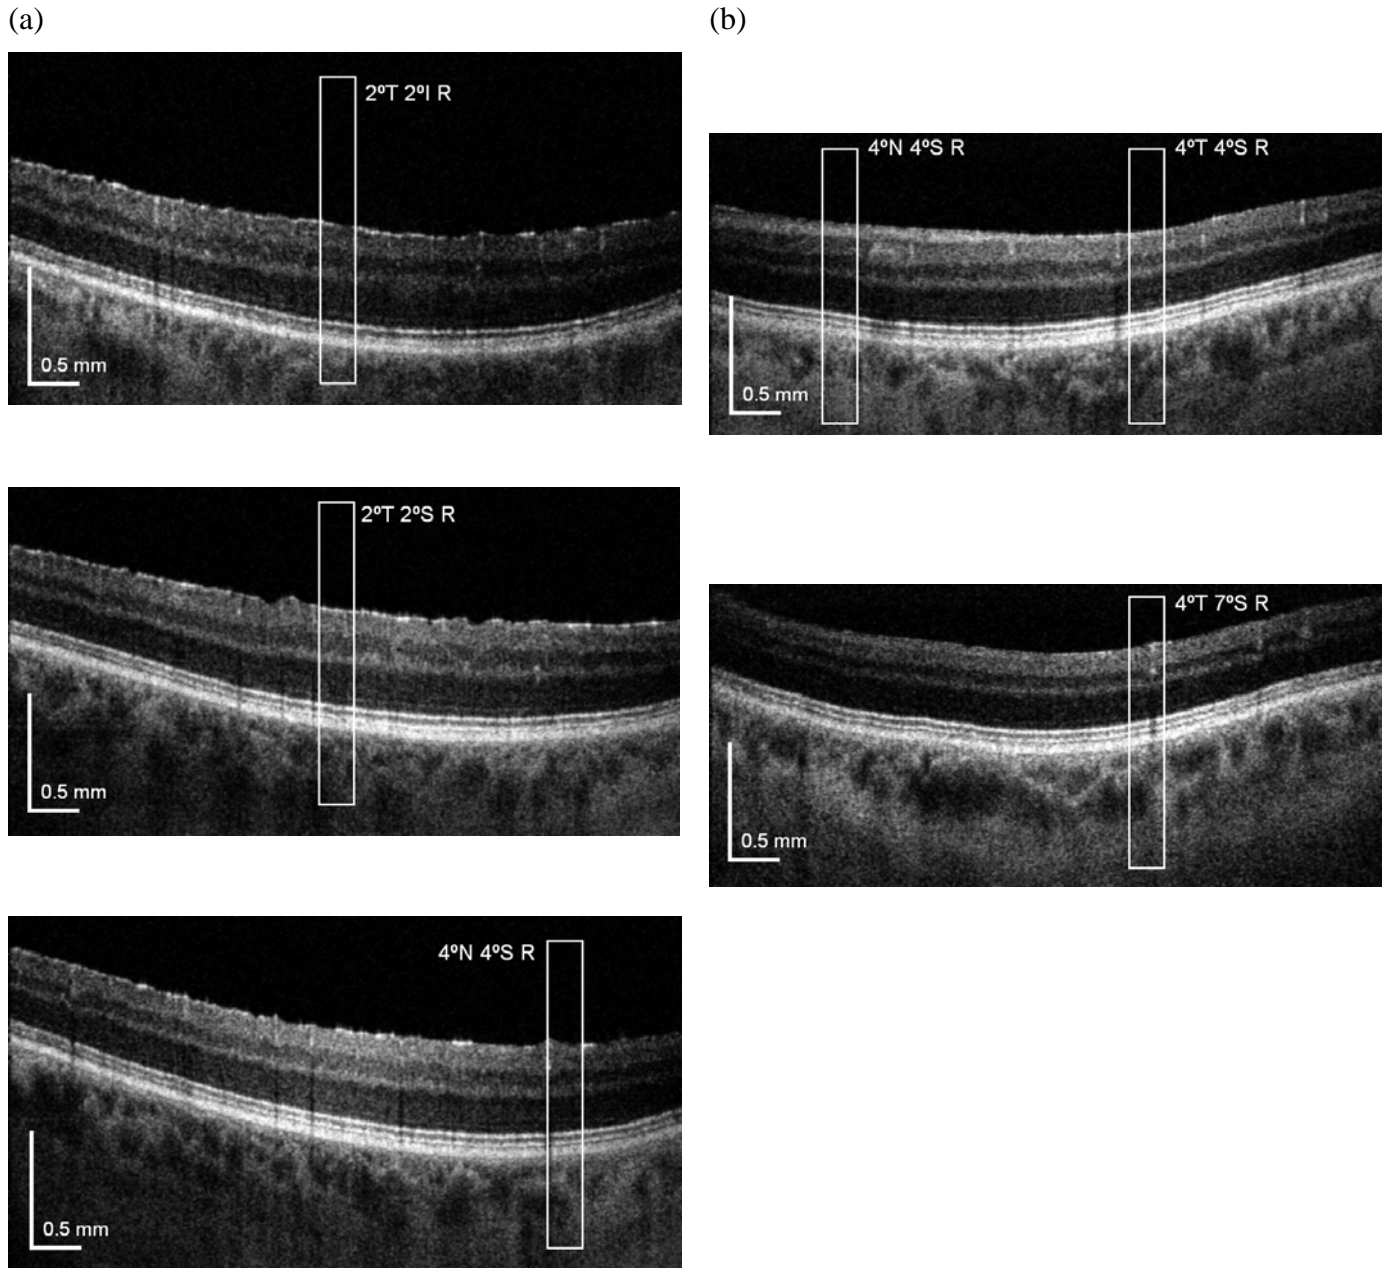

**Supplementary Figure S1.** FD-OCT images at the corresponding vertical locations in the retina in both eyes of the NAION patient; (a) right eye and (b) left eye. Each box represents the location where the AO-flood *en face* images were acquired. Scale bar = 0.5 mm. T: temporal, N: nasal, S: superior, I: inferior, R: retina.
